# Supplementary material for: Exploration of the causal relationship between obesity and sepsis and investigation of the mechanism of anoikis in sepsis
Source: Research Square preprint supplement (doi:10.21203/rs.3.rs-4949529/v1), 2024-09-23
Supplement: Supplementary file 1 [file 772b955c21f6e13ac5ad9f28.docx]

| Exposure | Dataset | Year | Population | Sample | NSNPs | Consortium |
| --- | --- | --- | --- | --- | --- | --- |
| BMI | ukb-b-19953 | 2018 | European | 461460 | 9851867 | MRC-IEU |
| WC | ukb-b-940 | 2018 | European | 462166 | 9851867 | MRC-IEU |
| HC | ukb-b-15590 | 2018 | European | 462117 | 9851867 | MRC-IEU |
| Outcome |  |  |  |  |  |  |
| Sepsis | ieu-b-4980 | 2021 | European | 486484 | 12243539 | UK Biobank |

Table S1. GWAS Data Details
